# Supplementary material for: The hazards of iron loading
Source: Royal Society of Chemistry journal article supplement (doi:10.1039/c0mt00023j), 2010-01-01
Supplement: c0mt00023jtable4.pdf [file c0mt00023jtable4.pdf]

Table 4.        **Conditions that can result in iron loading**

---

**Genetic disorders**

Aceruloplasminemia  
African siderosis  
Hemochromatosis  
    Types 1, 2, 3, 4  
Hemoglobinopathies  
    Sickleemia  
    Thalassemia  
Myelodysplasia

**Behavioral factors**

Ingestion of excessive amounts: heme (red meat); ethanol; iron supplements;  
    ascorbic acid; iron-adulterated food

Inhalation of items that contain or are contaminated with iron: asbestos; coal;  
    sand; tobacco smoke; industrial sources of iron; urban & subway air particulates

Injection of excessive amounts of iron saccharates, whole blood or erythrocytes

**Pathological conditions**

Release of body iron into plasma in hemolytic conditions; hepatitis; myelo-ablative  
    conditioning prior to cell/tissue transplant

Splenectomy
