# Supplementary material for: The hazards of iron loading
Source: Royal Society of Chemistry journal article supplement (doi:10.1039/c0mt00023j), 2010-01-01
Supplement: c0mt00023jtable5.pdf [file c0mt00023jtable5.pdf]

Table 5. **Enhanced mortality associated with elevated transferrin iron saturation (Tfsat)**

| <u>Years after Tfsat observation</u> | <u>Mortality (%)</u> |                      |
|--------------------------------------|----------------------|----------------------|
|                                      | <u>Tfsat &lt;55%</u> | <u>Tfsat &gt;55%</u> |
| 0                                    | 0                    | 0                    |
| 4                                    | 3.5                  | 6                    |
| 8                                    | 8                    | 16                   |
| 12                                   | 13                   | 24                   |
| 16                                   | 20                   | 32                   |
| 20                                   | 25.5                 | 34                   |
| 22                                   | 26.5                 | 36                   |

Data from Fig. 1<sup>110</sup>
